# Supplementary material
Source: Elsevier journal article supplement (https://cris.unibo.it/retrieve/handle/11585/947170/15839467-4738-47f2-82ba-f26462057132/mmc1.pdf)
Supplement: mmc1 [file mmc1.pdf]

| REGION                | Rates 2006-2007 |       |       |      |       |      | 2006-2007 lower limit |       |       |      |       |      | 2006-2007 upper limit |       |       |      |       |      | Rates 2018-2019 |       |       |      |       |      | 2018-2019 lower limit |       |       |      |       |      | 2018-2019 upper limit |       |       |      |       |      |
|-----------------------|-----------------|-------|-------|------|-------|------|-----------------------|-------|-------|------|-------|------|-----------------------|-------|-------|------|-------|------|-----------------|-------|-------|------|-------|------|-----------------------|-------|-------|------|-------|------|-----------------------|-------|-------|------|-------|------|
|                       | TR M            | AV M  | PR M  | TR F | AV F  | PR F | TR M                  | AV M  | PR M  | TR F | AV F  | PR F | TR M                  | AV M  | PR M  | TR F | AV F  | PR F | TR M            | AV M  | PR M  | TR F | AV F  | PR F | TR M                  | AV M  | PR M  | TR F | AV F  | PR F | TR M                  | AV M  | PR M  | TR F | AV F  | PR F |
| Piedmont              | 93,4            | 313,5 | 220,1 | 76,8 | 147,2 | 70,4 | 90,4                  | 308,1 | 215,6 | 74,2 | 143,6 | 67,9 | 96,4                  | 319,0 | 224,7 | 79,4 | 150,8 | 72,9 | 70,7            | 228,4 | 157,7 | 61,2 | 119,8 | 58,6 | 68,2                  | 223,9 | 153,9 | 59,0 | 116,6 | 56,4 | 73,3                  | 233,0 | 161,5 | 63,6 | 123,1 | 60,9 |
| Aosta Valley          | 86,0            | 332,1 | 246,1 | 78,3 | 154,1 | 75,9 | 86,5                  | 299,0 | 217,7 | 63,2 | 132,6 | 60,9 | 105,2                 | 368,0 | 277,2 | 96,0 | 178,3 | 93,5 | 63,3            | 229,8 | 166,6 | 50,8 | 108,4 | 57,6 | 50,0                  | 203,7 | 144,4 | 39,2 | 91,1  | 45,2 | 79,1                  | 258,6 | 191,3 | 65,0 | 128,2 | 72,5 |
| Lombardy              | 84,9            | 306,6 | 223,8 | 71,5 | 140,3 | 68,8 | 82,9                  | 304,9 | 220,6 | 69,8 | 137,9 | 67,1 | 86,9                  | 312,4 | 227,0 | 73,3 | 142,8 | 70,5 | 58,9            | 203,9 | 145,1 | 53,0 | 108,6 | 55,5 | 57,3                  | 201,0 | 142,6 | 51,6 | 106,5 | 54,1 | 60,5                  | 206,9 | 147,5 | 54,5 | 110,6 | 57,0 |
| AP of Bolzano         | 85,6            | 284,9 | 199,3 | 61,6 | 127,5 | 65,9 | 76,5                  | 268,1 | 185,4 | 54,2 | 116,7 | 58,2 | 95,5                  | 302,0 | 214,0 | 69,7 | 138,9 | 74,2 | 55,8            | 207,2 | 151,4 | 45,9 | 96,9  | 51,1 | 49,0                  | 194,0 | 140,1 | 40,0 | 88,3  | 44,8 | 63,3                  | 221,1 | 163,3 | 52,4 | 106,2 | 57,9 |
| AP of Trento          | 81,4            | 302,7 | 221,3 | 67,2 | 129,7 | 62,5 | 72,9                  | 286,2 | 207,2 | 59,9 | 119,4 | 55,4 | 90,7                  | 320,0 | 236,1 | 75,3 | 140,7 | 70,2 | 49,7            | 177,7 | 127,9 | 43,1 | 85,3  | 42,2 | 43,8                  | 166,2 | 118,3 | 37,7 | 77,6  | 36,8 | 56,3                  | 189,7 | 138,2 | 49,2 | 93,6  | 48,1 |
| Veneto                | 84,3            | 290,3 | 206,0 | 66,9 | 130,5 | 63,6 | 81,5                  | 285,1 | 201,6 | 64,6 | 127,2 | 61,2 | 87,2                  | 295,7 | 210,5 | 69,4 | 133,9 | 66,0 | 59,7            | 194,8 | 135,1 | 50,7 | 100,1 | 49,4 | 57,5                  | 190,8 | 131,8 | 48,7 | 97,3  | 47,5 | 62,0                  | 198,9 | 138,5 | 52,7 | 103,0 | 51,5 |
| Friuli-Venezia Giulia | 88,7            | 310,5 | 221,8 | 78,7 | 159,5 | 80,8 | 83,3                  | 300,3 | 213,2 | 73,8 | 152,5 | 75,9 | 94,4                  | 321,0 | 230,7 | 83,8 | 166,7 | 86,0 | 64,4            | 219,1 | 154,7 | 57,3 | 113,1 | 55,8 | 59,9                  | 210,8 | 147,8 | 53,2 | 107,4 | 51,8 | 69,1                  | 227,7 | 162,0 | 61,7 | 119,1 | 60,1 |
| Liguria               | 84,1            | 283,4 | 199,3 | 73,7 | 138,2 | 64,5 | 79,6                  | 275,1 | 192,4 | 69,7 | 132,8 | 60,8 | 88,8                  | 291,9 | 206,5 | 77,9 | 143,9 | 68,4 | 68,1            | 218,5 | 150,5 | 60,2 | 118,7 | 58,5 | 64,0                  | 211,2 | 144,4 | 56,5 | 113,5 | 55,0 | 72,3                  | 226,1 | 156,7 | 64,0 | 124,1 | 62,3 |
| Emilia-Romagna        | 84,8            | 284,5 | 199,6 | 69,5 | 137,4 | 67,8 | 81,9                  | 279,1 | 195,2 | 67,0 | 133,8 | 65,4 | 87,8                  | 289,9 | 204,2 | 72,1 | 141,0 | 70,4 | 57,1            | 194,6 | 137,5 | 52,4 | 110,8 | 58,4 | 54,8                  | 190,4 | 134,0 | 50,3 | 107,8 | 56,2 | 59,5                  | 198,9 | 141,2 | 54,6 | 113,9 | 60,7 |
| Toscany               | 78,5            | 274,6 | 196,1 | 67,4 | 128,6 | 61,2 | 75,5                  | 269,0 | 191,4 | 64,8 | 124,9 | 58,7 | 81,6                  | 280,3 | 200,9 | 70,1 | 132,3 | 63,8 | 58,2            | 199,0 | 140,8 | 55,5 | 109,7 | 54,1 | 55,7                  | 194,4 | 136,9 | 53,2 | 106,4 | 51,8 | 60,8                  | 203,6 | 144,7 | 57,9 | 113,0 | 56,5 |
| Umbria                | 80,1            | 268,3 | 188,3 | 68,1 | 131,1 | 63,0 | 73,9                  | 257,0 | 178,8 | 62,7 | 123,6 | 57,8 | 86,6                  | 280,0 | 198,1 | 73,9 | 139,1 | 68,6 | 59,9            | 189,5 | 129,5 | 52,0 | 105,7 | 53,6 | 54,8                  | 180,3 | 121,9 | 47,4 | 99,1  | 49,0 | 65,5                  | 199,1 | 137,5 | 57,0 | 112,6 | 58,6 |
| Marche                | 81,0            | 264,0 | 183,0 | 59,9 | 115,3 | 55,4 | 76,3                  | 255,5 | 175,9 | 56,0 | 109,9 | 51,7 | 85,9                  | 272,8 | 190,4 | 64,0 | 120,9 | 59,3 | 61,6            | 192,9 | 131,3 | 54,8 | 103,8 | 49,0 | 57,6                  | 185,8 | 125,5 | 51,1 | 98,8  | 45,6 | 65,8                  | 200,2 | 137,4 | 58,6 | 109,0 | 52,7 |
| Lazio                 | 92,9            | 309,1 | 216,3 | 74,2 | 144,9 | 70,7 | 90,1                  | 304,1 | 212,0 | 71,9 | 141,7 | 68,4 | 95,7                  | 314,3 | 220,6 | 76,6 | 148,2 | 73,0 | 76,0            | 230,8 | 154,8 | 62,9 | 126,0 | 63,1 | 73,6                  | 226,7 | 151,4 | 60,9 | 123,2 | 61,1 | 78,4                  | 234,9 | 158,2 | 65,0 | 129,0 | 65,2 |
| Abruzzo               | 95,7            | 296,8 | 201,0 | 68,8 | 128,1 | 59,4 | 90,1                  | 286,8 | 192,9 | 64,2 | 121,9 | 55,2 | 101,7                 | 307,0 | 209,5 | 73,6 | 134,7 | 63,9 | 72,2            | 222,8 | 150,6 | 61,7 | 111,9 | 50,2 | 67,5                  | 214,5 | 143,9 | 57,5 | 106,3 | 46,5 | 77,1                  | 231,2 | 157,6 | 66,1 | 117,7 | 54,2 |
| Molise                | 96,7            | 298,6 | 201,9 | 74,9 | 133,3 | 58,4 | 85,3                  | 278,4 | 185,4 | 65,4 | 120,5 | 50,0 | 109,0                 | 319,8 | 219,6 | 85,4 | 147,1 | 67,8 | 77,5            | 246,7 | 169,2 | 58,9 | 106,4 | 47,6 | 67,8                  | 229,2 | 154,8 | 50,6 | 95,2  | 40,2 | 88,2                  | 265,2 | 184,6 | 68,2 | 118,7 | 56,0 |
| Campania              | 109,5           | 370,3 | 260,8 | 92,6 | 185,6 | 93,0 | 106,4                 | 364,4 | 255,9 | 89,9 | 181,7 | 90,2 | 112,8                 | 376,2 | 265,7 | 95,4 | 189,5 | 95,8 | 88,0            | 268,6 | 180,6 | 77,1 | 147,4 | 70,4 | 85,4                  | 264,1 | 176,9 | 74,7 | 144,2 | 68,2 | 90,7                  | 273,2 | 184,4 | 79,4 | 150,7 | 72,6 |
| Apulia                | 82,1            | 292,6 | 210,5 | 77,1 | 142,4 | 65,4 | 79,0                  | 286,7 | 205,5 | 74,2 | 138,6 | 62,8 | 85,3                  | 298,6 | 215,6 | 80,0 | 146,4 | 68,1 | 68,3            | 216,9 | 148,6 | 65,1 | 115,2 | 50,1 | 65,7                  | 212,2 | 144,7 | 62,6 | 111,9 | 48,0 | 71,1                  | 221,7 | 152,6 | 67,6 | 118,5 | 52,3 |
| Basilicata            | 95,9            | 312,9 | 217,0 | 77,2 | 140,5 | 63,3 | 87,3                  | 297,4 | 204,1 | 69,9 | 130,7 | 56,8 | 105,0                 | 329,0 | 230,4 | 84,9 | 150,8 | 70,4 | 71,7            | 228,4 | 156,7 | 62,1 | 115,2 | 53,1 | 64,6                  | 215,7 | 146,2 | 55,7 | 106,4 | 47,2 | 79,4                  | 241,8 | 167,8 | 69,1 | 124,5 | 59,5 |
| Calabria              | 98,7            | 304,6 | 205,9 | 76,6 | 141,4 | 64,8 | 93,9                  | 296,1 | 199,0 | 72,5 | 135,9 | 61,1 | 103,7                 | 313,3 | 213,0 | 80,9 | 147,1 | 68,7 | 85,3            | 245,4 | 160,1 | 68,9 | 120,9 | 52,1 | 81,1                  | 238,1 | 154,2 | 65,1 | 116,0 | 48,9 | 89,7                  | 252,8 | 166,0 | 72,7 | 126,0 | 55,4 |
| Sicily                | 103,1           | 326,7 | 223,6 | 92,0 | 169,1 | 77,0 | 99,9                  | 321,1 | 219,0 | 89,2 | 165,2 | 74,5 | 106,3                 | 332,4 | 228,4 | 94,9 | 172,9 | 79,6 | 83,2            | 245,9 | 162,7 | 73,7 | 133,7 | 60,0 | 80,5                  | 241,3 | 159,0 | 71,3 | 130,5 | 57,8 | 85,9                  | 250,5 | 166,5 | 76,2 | 137,0 | 62,2 |
| Sardinia              | 89,6            | 328,4 | 238,8 | 72,5 | 132,8 | 60,3 | 84,7                  | 319,0 | 230,8 | 68,3 | 127,1 | 56,5 | 94,8                  | 338,0 | 247,0 | 76,9 | 138,7 | 64,3 | 68,3            | 245,6 | 177,3 | 59,8 | 110,6 | 50,8 | 64,3                  | 238,1 | 170,9 | 56,2 | 105,7 | 47,5 | 72,5                  | 253,4 | 183,9 | 63,6 | 115,7 | 54,3 |
| Italy                 | 90,0            | 306,3 | 216,2 | 75,1 | 144,5 | 69,3 | 89,2                  | 304,7 | 215,0 | 74,4 | 143,5 | 68,7 | 90,9                  | 307,8 | 217,5 | 75,9 | 145,5 | 70,0 | 68,5            | 219,9 | 151,4 | 60,3 | 117,1 | 56,7 | 67,8                  | 218,6 | 150,4 | 59,7 | 116,2 | 56,1 | 69,2                  | 221,1 | 152,4 | 61,0 | 117,9 | 57,3 |

| REGION                | Difference 2006/7 - 2018/9 in absolute values |        |       |       |       |       | Difference in absolute values lower limit |        |       |       |       |       | Difference in absolute values upper limit |        |       |       |       |       | Difference 2006/7 - 2018/9 in % |       |       |       |       |       | Difference in % lower limit |       |       |       |       |       | Difference in % upper limit |       |       |       |       |       |
|-----------------------|-----------------------------------------------|--------|-------|-------|-------|-------|-------------------------------------------|--------|-------|-------|-------|-------|-------------------------------------------|--------|-------|-------|-------|-------|---------------------------------|-------|-------|-------|-------|-------|-----------------------------|-------|-------|-------|-------|-------|-----------------------------|-------|-------|-------|-------|-------|
|                       | TR M                                          | AV M   | PR M  | TR F  | AV F  | PR F  | TR M                                      | AV M   | PR M  | TR F  | AV F  | PR F  | TR M                                      | AV M   | PR M  | TR F  | AV F  | PR F  | TR M                            | AV M  | PR M  | TR F  | AV F  | PR F  | TR M                        | AV M  | PR M  | TR F  | AV F  | PR F  | TR M                        | AV M  | PR M  | TR F  | AV F  | PR F  |
| Piedmont              | -22,6                                         | -85,1  | -62,5 | -15,6 | -27,4 | -11,8 | -22,2                                     | -84,2  | -61,7 | -15,3 | -27,0 | -11,6 | -23,0                                     | -86,0  | -63,2 | -15,9 | -27,8 | -12,1 | -24,2                           | -27,1 | -28,4 | -20,3 | -18,6 | -16,8 | -24,5                       | -27,3 | -28,6 | -20,6 | -18,8 | -17,0 | -23,9                       | -27,0 | -28,1 | -20,0 | -18,4 | -16,5 |
| Aosta Valley          | -22,7                                         | -102,3 | -79,6 | -27,5 | -45,8 | -18,3 | -19,5                                     | -95,3  | -73,4 | -24,0 | -41,5 | -15,7 | -26,0                                     | -109,4 | -85,9 | -31,0 | -50,2 | -21,0 | -30,6                           | -33,9 | -35,2 | -25,9 | -22,6 | -19,3 | -28,1                       | -31,9 | -33,7 | -38,0 | -31,3 | -25,8 | -24,8                       | -29,7 | -31,0 | -32,3 | -28,1 | -22,4 |
| Lombardy              | -26,0                                         | -104,7 | -78,7 | -18,5 | -31,8 | -13,3 | -25,6                                     | -103,8 | -78,0 | -18,2 | -31,4 | -13,0 | -26,4                                     | -105,6 | -79,5 | -18,8 | -32,1 | -13,5 | -30,6                           | -33,9 | -35,2 | -25,9 | -22,6 | -19,3 | -30,9                       | -34,1 | -35,4 | -26,1 | -22,8 | -19,4 | -30,4                       | -33,8 | -35,0 | -25,7 | -22,5 | -19,1 |
| AP of Bolzano         | -29,8                                         | -77,7  | -47,9 | -15,8 | -30,6 | -14,8 | -27,5                                     | -74,2  | -45,2 | -14,2 | -28,5 | -13,4 | -32,2                                     | -81,3  | -50,7 | -17,3 | -32,7 | -16,3 | -34,8                           | -27,3 | -24,1 | -25,6 | -24,0 | -22,5 | -35,9                       | -41,7 | -24,4 | -26,3 | -24,4 | -23,0 | -33,7                       | -26,9 | -23,7 | -24,9 | -23,6 | -22,0 |
| AP of Trento          | -31,7                                         | -125,1 | -93,4 | -24,1 | -44,4 | -20,3 | -29,1                                     | -119,9 | -88,9 | -22,2 | -41,8 | -18,6 | -34,4                                     | -130,4 | -97,9 | -26,1 | -47,1 | -22,1 | -39,0                           | -41,3 | -42,2 | -35,9 | -34,2 | -32,5 | -40,0                       | -41,9 | -42,9 | -37,0 | -35,0 | -33,5 | -37,9                       | -40,7 | -41,5 | -34,7 | -33,5 | -31,4 |
| Veneto                | -24,7                                         | -95,5  | -70,9 | -16,3 | -30,4 | -14,1 | -24,1                                     | -94,3  | -69,8 | -15,9 | -29,8 | -13,7 | -25,3                                     | -96,8  | -72,0 | -16,7 | -31,0 | -14,5 | -29,2                           | -32,9 | -34,4 | -24,3 | -23,3 | -22,2 | -29,5                       | -33,1 | -34,6 | -24,6 | -23,5 | -22,4 | -29,0                       | -32,7 | -34,2 | -24,0 | -23,1 | -22,0 |
| Friuli-Venezia Giulia | -24,3                                         | -91,4  | -67,1 | -21,4 | -46,3 | -24,9 | -23,3                                     | -89,5  | -65,4 | -20,6 | -45,1 | -24,0 | -25,3                                     | -93,3  | -68,7 | -22,2 | -47,5 | -25,9 | -27,4                           | -29,4 | -30,2 | -27,2 | -29,0 | -30,9 | -28,0                       | -29,8 | -30,7 | -27,9 | -29,6 | -31,7 | -26,8                       | -29,1 | -29,8 | -26,4 | -28,5 | -30,1 |
| Liguria               | -16,0                                         | -64,9  | -48,9 | -13,5 | -19,5 | -6,0  | -15,6                                     | -63,9  | -48,0 | -13,2 | -19,2 | -5,9  | -16,4                                     | -65,9  | -49,7 | -13,8 | -19,8 | -6,1  | -19,0                           | -22,9 | -24,5 | -18,4 | -14,1 | -9,3  | -19,6                       | -23,2 | -25,0 | -19,0 | -14,5 | -9,7  | -18,5                       | -22,6 | -24,1 | -17,8 | -13,8 | -8,9  |
| Emilia-Romagna        | -27,7                                         | -89,8  | -62,1 | -17,1 | -26,5 | -9,5  | -27,1                                     | -88,7  | -61,2 | -16,6 | -26,0 | -9,2  | -28,4                                     | -90,9  | -63,0 | -17,5 | -27,0 | -9,7  | -32,7                           | -31,6 | -31,1 | -24,6 | -19,3 | -13,9 | -33,1                       | -31,8 | -31,4 | -24,8 | -19,5 | -14,0 | -32,3                       | -31,4 | -30,9 | -24,3 | -19,2 | -13,8 |
| Toscany               | -20,3                                         | -75,7  | -55,3 | -11,9 | -18,9 | -7,1  | -19,8                                     | -74,6  | -54,5 | -11,6 | -18,6 | -6,8  | -20,8                                     | -76,7  | -56,2 | -12,2 | -19,3 | -7,3  | -25,9                           | -27,6 | -28,2 | -17,6 | -14,7 | -11,5 | -26,2                       | -27,8 | -28,5 | -17,9 | -14,9 | -11,7 | -25,5                       | -27,4 | -28,0 | -17,4 | -14,6 | -11,4 |
| Umbria                | -20,1                                         | -78,9  | -58,7 | -16,1 | -25,5 | -9,4  | -19,2                                     | -76,8  | -56,9 | -15,3 | -24,5 | -8,8  | -21,1                                     | -81,0  | -60,6 | -16,9 | -26,5 | -10,0 | -25,1                           | -29,4 | -31,2 | -23,6 | -19,4 | -14,9 | -25,9                       | -29,9 | -31,8 | -24,4 | -19,8 | -15,3 | -24,4                       | -28,9 | -30,6 | -22,9 | -19,0 | -     |
